# Supplementary material for: Upregulation of HPV16E1 and E7 expression and FOXO3a mRNA downregulation in high-grade cervical neoplasia
Source: PeerJ. 2024 Dec 6;12:e18601. doi: 10.7717/peerj.18601 (PMC11627083; doi:10.7717/peerj.18601)
Supplement: Supplemental Information 6 [file peerj-12-18601-s006.xlsx]

## Sheet: Sheet1
The raw data of FOXO3a mRNA expression in cell lines
	HCxECs	C-33A	Ca Ski	SiHa	HeLa	RFW
Experiment1	3.383	0.073	0.11	0.014	0.035	Undetermined
Experiment2	1.043	0.114	0.078	0.026	0.028	Undetermined
Experiment3	1.85	0.095	0.112	0.025	0.029	Undetermined
Mean	2.092	0.094	0.1	0.0216667	0.0306667
SEM	0.686251	0.0118462	0.0110151	0.00384419	0.00218581
