# Supplementary material for: Upregulation of HPV16E1 and E7 expression and FOXO3a mRNA downregulation in high-grade cervical neoplasia
Source: PeerJ. 2024 Dec 6;12:e18601. doi: 10.7717/peerj.18601 (PMC11627083; doi:10.7717/peerj.18601)
Supplement: Supplemental Information 7 [file peerj-12-18601-s007.xlsx]

## Sheet: Sheet1
The raw data of gene expression (Log10-Fold Change)
Sample number	Cytology	Age	HPV16E1	HPV16E4	HPV16E6	HPV16E6*I	HPV16E7	FOXO3a
01	NILM	43	0.75	Undetermined	-0.05	2.43	1.04006	0.164273
02	NILM	41	1.1	0.34	1.05	0.05	0.860043	0.115504
03	NILM	48	-0.38	0.03	-0.64	0.4	-0.635168	0.328936
04	NILM	61	-0.36	0.37	-0.67	-1.35	-0.533118	-0.157528
05	NILM	50	-2	Undetermined	-2.55	-1.18	-1.98213	Undetermined
06	NILM	30	0.3	-0.89	0.2	-0.79	-0.0319095	0.238024
07	NILM	26	1.96	0.58	1.62	1.11	1.77698	Undetermined
08	NILM	31	0.14	0.1	-0.12	-0.81	-0.00933266	0.607389
09	NILM	32	-0.8	Undetermined	Undetermined	-0.97	-0.847712	0.578489
10	NILM	40	1.82	-0.24	1.85	1.11	1.44705	-0.0473528
11	NILM	32	-0.74	-0.3	-0.69	Undetermined	-1.08492	-0.243022
12	NILM	58	Undetermined	Undetermined	Undetermined	Undetermined	Undetermined	Undetermined
13	NILM	39	1.14	Undetermined	Undetermined	Undetermined	Undetermined	1.06646
14	NILM	26	0.98	Undetermined	0.8	2.15	0.435591	0.318399
15	NILM	56	-0.77	Undetermined	0.21	0.75	-0.869377	0.934608
16	NILM	50	Undetermined	Undetermined	-0.42	1.57	0.194165	0.684151
17	NILM	32	-1.7	Undetermined	-3.05	Undetermined	-2.97062	0.182937
18	NILM	45	1.67	Undetermined	-3.22	Undetermined	-2.6925	0.197385
19	NILM	69	-1	-1.7	Undetermined	-2.09	-1.24413	0.160357
20	NILM	52	0.24	0.71	-1.83	-1.02	0.116498	0.366565
21	NILM	50	1.39	0.76	1.16	0.16	1.12073	0.559825
22	NILM	33	0.06	Undetermined	Undetermined	4.27	Undetermined	0.427974
23	NILM	31	Undetermined	Undetermined	Undetermined	Undetermined	-2.99568	0.104067
24	NILM	70	0.06	0.3	0.004	-0.39	-0.138173	-0.10575
25	NILM	60	1.24	1.66	-1.77	0.24	1.02922	-0.22195
26	NILM	60	2.25	Undetermined	2.2	1.31	2.02683	-0.300214
27	NILM	46	-0.06	-0.48	-2.82	Undetermined	-0.304037	-0.160843
28	NILM	50	-0.39	Undetermined	-2.47	Undetermined	-0.824227	-0.219841
29	NILM	40	-0.18	-0.92	Undetermined	-0.55	-0.577082	0.471022
30	NILM	29	0.14	0.46	-0.03	-1.66	-0.119507	0.0742641
31	NILM	28	-0.6	-0.59	-3.7	6.64	-0.781176	-0.134351
32	NILM	30	-0.08	-0.82	-3.7	-2.55	-0.297113	0.00623065
33	NILM	57	-1.15	Undetermined	-1.9	-2.69	-1.33989	0.0480726
34	NILM	46	-0.33	Undetermined	1.2	2.55	1.86639	1.01107
35	NILM	89	Undetermined	Undetermined	Undetermined	Undetermined	Undetermined	Undetermined
36	NILM	27	-1.1	-1.05	-1.03	-0.33	-0.934383	0.203707
37	NILM	42	1.76	1.06	1.69	0.63	1.47113	-1.15814
38	NILM	33	-2	Undetermined	-3.3	Undetermined	-1.38658	0.15765
39	NILM	31	-0.85	-0.96	-0.8	Undetermined	-1.04306	0.118215
40	ASC-US	45	Undetermined	Undetermined	0.83	2.38	2.9808	Undetermined
41	ASC-US	37	Undetermined	Undetermined	Undetermined	Undetermined	-0.211627	Undetermined
42	ASC-US	41	-0.92	Undetermined	-1.18	Undetermined	-0.100245	1.46743
43	ASC-US	26	0.1	Undetermined	-0.17	Undetermined	-0.0409395	1.15827
44	ASC-US	41	0.29	-0.34	-2.82	-2.72	-0.0276953	0.117009
45	ASC-US	37	2.68	2.5	1.44	0.48	2.35737	0.290704
46	ASC-US	40	-0.28	-0.96	-0.71	-0.92	-0.545765	0.109484
47	ASC-US	43	0.89	0.77	0.53	0.12	0.604769	-0.0446442
48	ASC-US	46	2.01	2.9	1.83	0.12	1.72611	-0.811662
49	ASC-US	33	1.22	0.95	-1.19	Undetermined	0.94102	-0.271922
50	ASC-US	30	0.22	0.52	-2.92	-0.85	-0.205903	-0.0946143
51	ASC-US	48	2.29	2.98	2.07	1.09	2.03045	0.345491
52	ASC-US	28	1.07	0.16	-1.51	-0.22	0.830843	0.0336248
53	ASC-US	30	0.84	0.16	0.93	-0.28	0.857635	0.0992489
54	ASC-US	35	1.42	2.87	2.9	1.13	2.7195	0.08179
55	ASC-US	39	-1.4	Undetermined	-2.4	-0.3	-1.26825	0.288296
56	ASC-US	37	0.43	-0.8	0.49	0.32	0.173996	0.0908222
57	ASC-US	27	-0.12	-0.3	-0.6	-2.03	-3.07058	0.0691462
58	ASC-US	48	2.08	2.3	1.44	-0.31	1.88023	0.191666
59	ASC-US	71	1.58	1.61	-1.77	-0.28	1.25439	0.152832
60	ASC-US	65	0.46	-0.59	-0.13	-0.61	0.14901	-0.0332015
61	ASC-US	33	-1.7	-0.59	-1.86	-2.42	-1.68613	-0.0196557
62	ASC-US	24	1.26	0.69	1.15	0.21	1.04999	-1.12113
63	ASC-US	36	-0.33	0.92	-1.73	-1.04	-0.482553	-0.0313956
64	ASC-US	27	0.69	0.84	0.69	0.24	0.404283	0.0492801
65	LSIL	28	1.73	0.52	1.17	0.65	1.60991	0.39757
66	LSIL	30	0.06	1.14	-3.51	-1.16	-0.21403	-0.214421
67	LSIL	57	3.32	4.16	-0.63	2.35	2.97869	0.542366
68	LSIL	39	-1.3	-1.7	-2.56	Undetermined	-1.66314	Undetermined
69	LSIL	53	4.92	3.81	0.002	3.12	4.59944	0.393055
70	LSIL	31	0.26	0.54	0.23	-0.99	-0.0171591	-0.557301
71	LSIL	55	0.91	0.63	0.88	-0.9	0.767626	Undetermined
72	LSIL	34	0.67	-0.49	0.58	-0.66	0.378997	0.267526
73	ASC-H	35	1.18	Undetermined	0.92	Undetermined	Undetermined	Undetermined
74	ASC-H	49	Undetermined	Undetermined	Undetermined	1.18	0.436193	0.343385
75	ASC-H	43	0.61	0.53	-2.7	-0.83	0.319091	0.058612
76	ASC-H	48	-0.24	0.43	-0.66	1.9	-0.560525	0.0884125
77	ASC-H	43	1.98	1.65	1.84	0.12	1.72099	0.0866054
78	HSIL/SCC	43	1.26	Undetermined	1.42	Undetermined	-0.450335	-0.686449
79	HSIL/SCC	88	2.58	2.09	-2.39	0.29	2.28452	-0.0365144
80	HSIL/SCC	21	1.42	1.16	2.21	-0.55	1.1108	-0.648803
81	HSIL/SCC	38	-0.26	-0.89	-1.53	-2.37	-0.287182	0.304553
82	HSIL/SCC	30	2.24	0.79	1.94	-0.06	1.77427	-1.40949
83	HSIL/SCC	36	0.68	1.21	0.75	-0.36	0.410605	-0.791505
84	HSIL/SCC	58	1.34	-0.43	1.26	0.32	1.36126	-0.756268
85	HSIL/SCC	39	1.24	2.29	0.98	0.6	1.1108	0.421352
RNase-Free Water (RFW)	No template control (NTC)		Undetermined	Undetermined	Undetermined	Undetermined	Undetermined	Undetermined
RNA from C-33A cells	Negative control		Undetermined	Undetermined	Undetermined	Undetermined	Undetermined
