# Supplementary material for: Upregulation of HPV16E1 and E7 expression and FOXO3a mRNA downregulation in high-grade cervical neoplasia
Source: PeerJ. 2024 Dec 6;12:e18601. doi: 10.7717/peerj.18601 (PMC11627083; doi:10.7717/peerj.18601)
Supplement: Supplemental Information 8 [file peerj-12-18601-s008.xls]

## Sheet: Sheet1
ITEM TO CHECK	IMPORTANCE	CHECKLIST
EXPERIMENTAL DESIGN
Definition of experimental and control groups	E	Yes	Line 128-129
Number within each group	E	Yes	Table 2
Assay carried out by core lab or investigator's lab?	D	Yes
Acknowledgement of authors' contributions	D	Yes
SAMPLE
Description	E	Yes	Line 98
Volume/mass of sample processed	D
Microdissection or macrodissection	E	Not applicable
Processing procedure	E	Yes	Line 98
If frozen - how and how quickly?	E	Not applicable
If fixed - with what, how quickly?	E	Not applicable
Sample storage conditions and duration (especially for FFPE samples)	E	Yes	Line 105-107
NUCLEIC ACID EXTRACTION
Procedure and/or instrumentation	E	Yes	Line 114
Name of kit and details of any modifications	E	Yes	Line 114
Source of additional reagents used	D	Not applicable
Details of DNase or RNAse treatment	E	Not applicable
Contamination assessment (DNA or RNA)	E	No
Nucleic acid quantification	E	Yes	Line 116
Instrument and method	E	Yes	Line 116
Purity (A260/A280)	D	No data	The purity of RNA was measured by a nanodrop. Then, the RNA will proceed to the next step if the A268/A280 value is under 2.0.
Yield	D	No data	The yield of RNA was measured by a nanodrop.
RNA integrity method/instrument	E	Not applicable
RIN/RQI or Cq of 3' and 5' transcripts	E	Not applicable
Electrophoresis traces	D
Inhibition testing (Cq dilutions, spike or other)	E	Not applicable
REVERSE TRANSCRIPTION
Complete reaction conditions	E	Yes	Line 116-118
Amount of RNA and reaction volume	E	Yes	Line 118
Priming oligonucleotide (if using GSP) and concentration	E	Not applicable				Supplemental Table S1
Reverse transcriptase and concentration	E	Yes	Line 117
Temperature and time	E	Yes	Line 117
Manufacturer of reagents and catalogue numbers	D
Cqs with and without RT	D*
Storage conditions of cDNA	D
qPCR TARGET INFORMATION
If multiplex, efficiency and LOD of each assay.	E	Not applicable
Sequence accession number	E	Not applicable
Location of amplicon	D
Amplicon length	E	Yes	Supplemental Table S1
In silico specificity screen (BLAST, etc)	E	Not applicable	All primers in this study come from the previously published articles
Pseudogenes, retropseudogenes or other homologs?	D
Sequence alignment	D
Secondary structure analysis of amplicon	D
Location of each primer by exon or intron (if applicable)	E	Not applicable	All primers in this study come from the previously published articles
What splice variants are targeted?	E	Not applicable	All primers in this study come from the previously published articles
qPCR OLIGONUCLEOTIDES
Primer sequences	E	Yes	Supplemental Table S1
RTPrimerDB Identification Number	D
Probe sequences	D**
Location and identity of any modifications	E	Yes	Supplemental Table S1
Manufacturer of oligonucleotides	D	Yes	Supplemental Table S1
Purification method	D
qPCR PROTOCOL
Complete reaction conditions	E	Yes	Line 118-127
Reaction volume and amount of cDNA/DNA	E	Yes	Line 121
Primer, (probe), Mg++ and dNTP concentrations	E	Yes	Line 127
Polymerase identity and concentration	E	Yes	Line 119
Buffer/kit identity and manufacturer	E	Yes	Line 119
Exact chemical constitution of the buffer	D
Additives (SYBR Green I, DMSO, etc.)	E	Yes	Line 119
Manufacturer of plates/tubes and catalog number	D
Complete thermocycling parameters	E	Yes	Line 123-126
Reaction setup (manual/robotic)	D
Manufacturer of qPCR instrument	E	Yes	Line 120-121
qPCR VALIDATION
Evidence of optimisation (from gradients)	D
Specificity (gel, sequence, melt, or digest)	E	Yes	Line 129-130
For SYBR Green I, Cq of the NTC	E	Yes	Line 130-131
Standard curves with slope and y-intercept	E	Not applicable	Due to the detection of fold change expression, standard curves are not used in this study.
PCR efficiency calculated from slope	E	Not applicable	Due to the detection of fold change expression, standard curves are not used in this study.
Confidence interval for PCR efficiency or standard error	D
r2 of standard curve	E	Not applicable	Due to the detection of fold change expression, standard curves are not used in this study.
Linear dynamic range	E	Not applicable	Due to the detection of fold change expression, standard curves are not used in this study.
Cq variation at lower limit	E	Not applicable	Due to the detection of fold change expression, standard curves are not used in this study.
Confidence intervals throughout range	D
Evidence for limit of detection	E	Not applicable	Due to the detection of fold change expression, standard curves are not used in this study.
If multiplex, efficiency and LOD of each assay.	E	Not applicable
DATA ANALYSIS
qPCR analysis program (source, version)	E	Yes	Excel
Cq method determination	E	Yes	Line 127-128
Outlier identification and disposition	E	Not applicable
Results of NTCs	E	Yes	NTC should not have a Ct value in all runs
Justification of number and choice of reference genes	E	Yes	Line 127
Description of normalisation method	E	Yes	Line 156-161
Number and concordance of biological replicates	D
Number and stage (RT or qPCR) of technical replicates	E	No
Repeatability (intra-assay variation)	E	No
Reproducibility (inter-assay variation, %CV)	D
Power analysis	D
Statistical methods for result significance	E	Yes	Line 161-162
Software (source, version)	E	Yes	Line 156-163
Cq or raw data submission using RDML	D
Table 1. MIQE checklist for authors, reviewers and editors. All essential information (E) must be submitted with the manuscript. Desirable
information (D) should be submitted if available. If using primers obtained from RTPrimerDB, information on qPCR target, oligonucleotides,
protocols and validation is available from that source.
*: Assessing the absence of DNA using a no RT assay is essential when first extracting RNA. Once the sample has been validated as
RDNA-free, inclusion of a no-RT control is desirable, but no longer essential.
**: Disclosure of the probe sequence is highly desirable and strongly encouraged. However, since not all commercial pre-designed assay
vendors provide this information, it cannot be an essential requirement. Use of such assays is advised against.
